# Supplementary material for: BET Inhibitors Synergize with Carfilzomib to Induce Cell Death in Cancer Cells via Impairing Nrf1 Transcriptional Activity and Exacerbating the Unfolded Protein Response
Source: PubMed Central journal article supplement (PMC7226130; doi:10.3390/biom10040501), 2020-03-26
Supplement: biomolecules-10-00501-s001.pdf [file biomolecules-10-00501-s001.pdf]

**Supporting Information**

**Table S1: Primers used in quantitative reverse transcription PCR**

| <b>Human Gene</b> | <b>Forward Primer (5'-3')</b> | <b>Reverse Primer (5'-3')</b> |
|-------------------|-------------------------------|-------------------------------|
| GADD34            | ACCCTTTCTTCCTCCTGTCC          | CCACTGTCTTCAGCCTCCTC          |
| CHOP              | CTTTCTCCTTCGGGACACTG          | TGTGACCTCTGCTGGTTCTG          |
| HERPUD1           | CTGGGAAGCTGTTGTTGGAT          | TCAGGATACTGTCCCCGATT          |
| BiP               | TCCTATGTCGCCTTCACTCC          | ACGGCAAGAACTTGATGTCC          |
| ATF3              | GTGCCGAAACAAGAAGAAGG          | TGGAGTCCTCCATTCTGAG           |
| ERO1LB            | TCCGGTTGGAATAAAAGCTG          | CACAAAAGTGATCCCGTGAA          |
| IFRD1             | GAAGACAAGGCAAGCAGCTC          | GGCCCAGCTGAATACAAAGA          |
| ERN1              | CACAGTGACGCTTCCTGAAA          | AGCGTATACAGGCTGCCATC          |
| PSMA7             | CTGTGCTTTGGATGACAACG          | CGATGTAGCGGGTGATGTACT         |
| PSMB7             | TGCAAAGAGGGGATACAAGC          | GCAACAACCATCCCTTCAGT          |
| PSMC4             | GGAAGACCATGTTGGCAAAG          | AAGATGATGGCAGGTGCATT          |
| PSMD12            | GTGCGCGACTGACTAAAACA          | TAGGCAGAGCCTCATTGCT           |
| 18S rRNA          | ATGGCCGTTCTTAGTTGGTG          | CGCTGAGCCAGTCAGTGTAG          |
| FOXM1             | TTCACAGCATCATCACAGCA          | CCTAGCTGCAGGTTTTGGTC          |
| TERT              | GAAGAACGTGCTGGCCTTC           | GAGCCACCAGCACAAAGAG           |
| BCL2              | GAGGATTGTGGCCTTCTTTG          | ACAGTTCCACAAAGGCATCC          |
| AURKB             | GTGTACTIONGGCTCGGGAGAA        | CAGCTCTTCTGCAGCTCCTT          |
